# Supplementary material for: Cellulose Nanofibril Based-Aerogel Microreactors: A High Efficiency and Easy Recoverable W/O/W Membrane Separation System
Source: PubMed Central journal article supplement (PMC5216329; doi:10.1038/srep40096), 2017-01-06
Supplement: srep40096-s1.pdf [file srep40096-s1.pdf]

# Cellulose Nanofibril Based-Aerogel Microreactors: A High Efficiency and Easy Recoverable W/O/W Membrane Separation System

Fang Zhang<sup>1,2</sup>, Hao Ren<sup>1</sup>, Jing Dou<sup>1</sup>, Guolin Tong<sup>1,\*</sup>, and Yulin Deng<sup>2,\*</sup>

<sup>1</sup>Jiangsu Provincial Key Lab of Pulp and Paper Science and Technology, Nanjing Forestry University, 159 LongPan Road, NanJing, JiangSu Province 210037, P. R. China

<sup>2</sup>School of Chemical & Biomolecular Engineering and RBI, Georgia Institute of Technology, 500 10th Street N.W., Atlanta, Georgia 30332-0620, United States

\*yulin.deng@rbi.gatech.edu

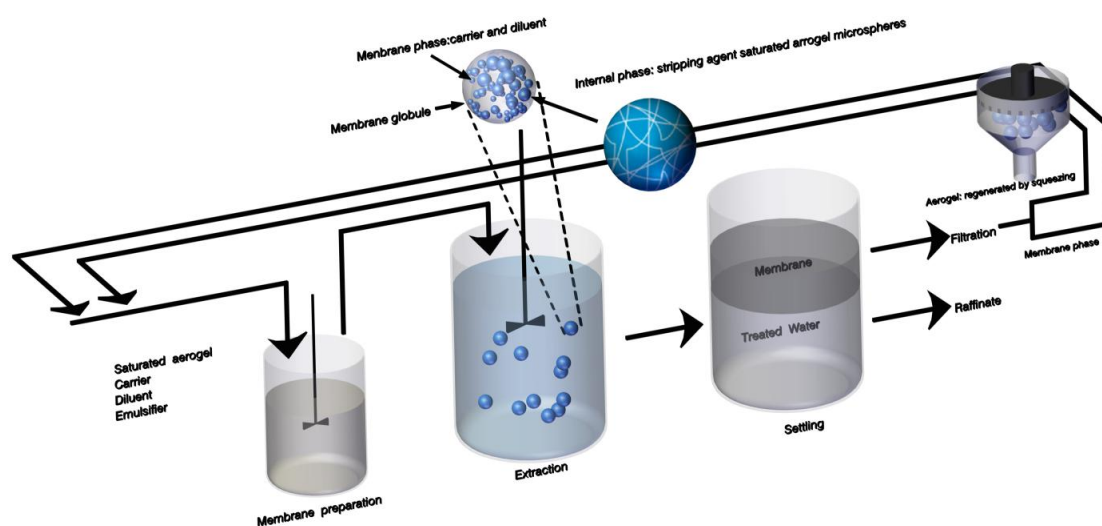

**Supplementary Figure S1.** Schematic illustration of cellulose nanofibril aerogel microspheres based W/O/W extraction process.

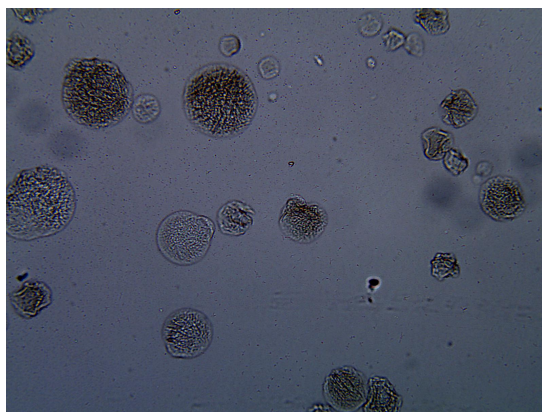

**Supplementary Figure S2.** The morphology of regenerated aerogel microspheres after 5 regeneration circles.
